# Supplementary material for: Inflammatory signaling regulates embryonic hematopoietic stem and progenitor cell production
Source: PubMed Central journal article supplement — Genes Dev. 2014 Dec 1;28(23):2597–612. doi: 10.1101/gad.253302.114 (PMC4248291; doi:10.1101/gad.253302.114), 2014-12-01
Supplement: supp_gad.253302.114_SuppMaterial.pdf [file supp_gad.253302.114_SuppMaterial.pdf]

## Supplemental Materials

### Supplemental Inventory

Figure S1. Delta area plot of consensus clustering.  
Related to Figure 2.

Figure S2. Heatmap of the eight gene clusters resulting from consensus clustering.  
Related to Figure 2.

Figure S3. Controls for zebrafish IFN morphants and IFN deficient mouse embryos.  
Related to Figure 5.

Figure S4. Expression of IRF2 target genes by qPCR.  
Related to Figure 6.

Figure S5. Primitive myeloid cells regulate HSPC formation in the AGM region.  
Related to Figure 7.

Table S1. Frequency of progenitors with lymphoid potential in sorted populations from the A+U+V.  
Related to Figure 1.

Table S2. Highly enriched Gene Ontology term for each cluster.  
Related to Figure 2.

Table S3. The genes and their expression in each cluster after consensus clustering.  
Related to Figure 2.

Table S4. Gene Ontology terms for IRF2 bound genes determined by GREAT.  
Related to Figure 6.

Table S5. Morpholino sequences.

Table S6. Primer sequences for qPCR in human samples.

Table S7. Primer sequences for qPCR in mouse samples.

Table S8. Primer sequences for qPCR in zebrafish samples.

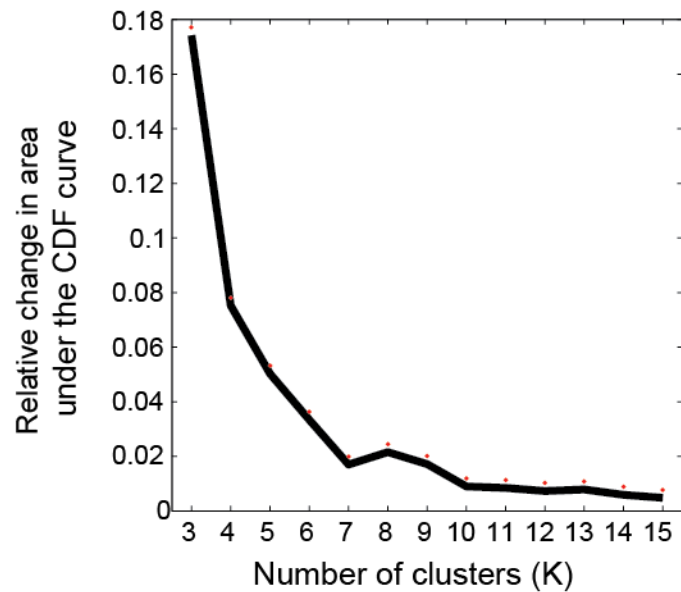

Figure S1. Delta area plot of consensus clustering. Related to Figure 2.

Change in area under the Consensus Cumulative Distribution function (CDF) comparing  $k$  and  $k-1$  clusters. CDF shows the cumulative distribution functions of the consensus matrix for each  $k$ , estimated by a histogram of 100 bins.

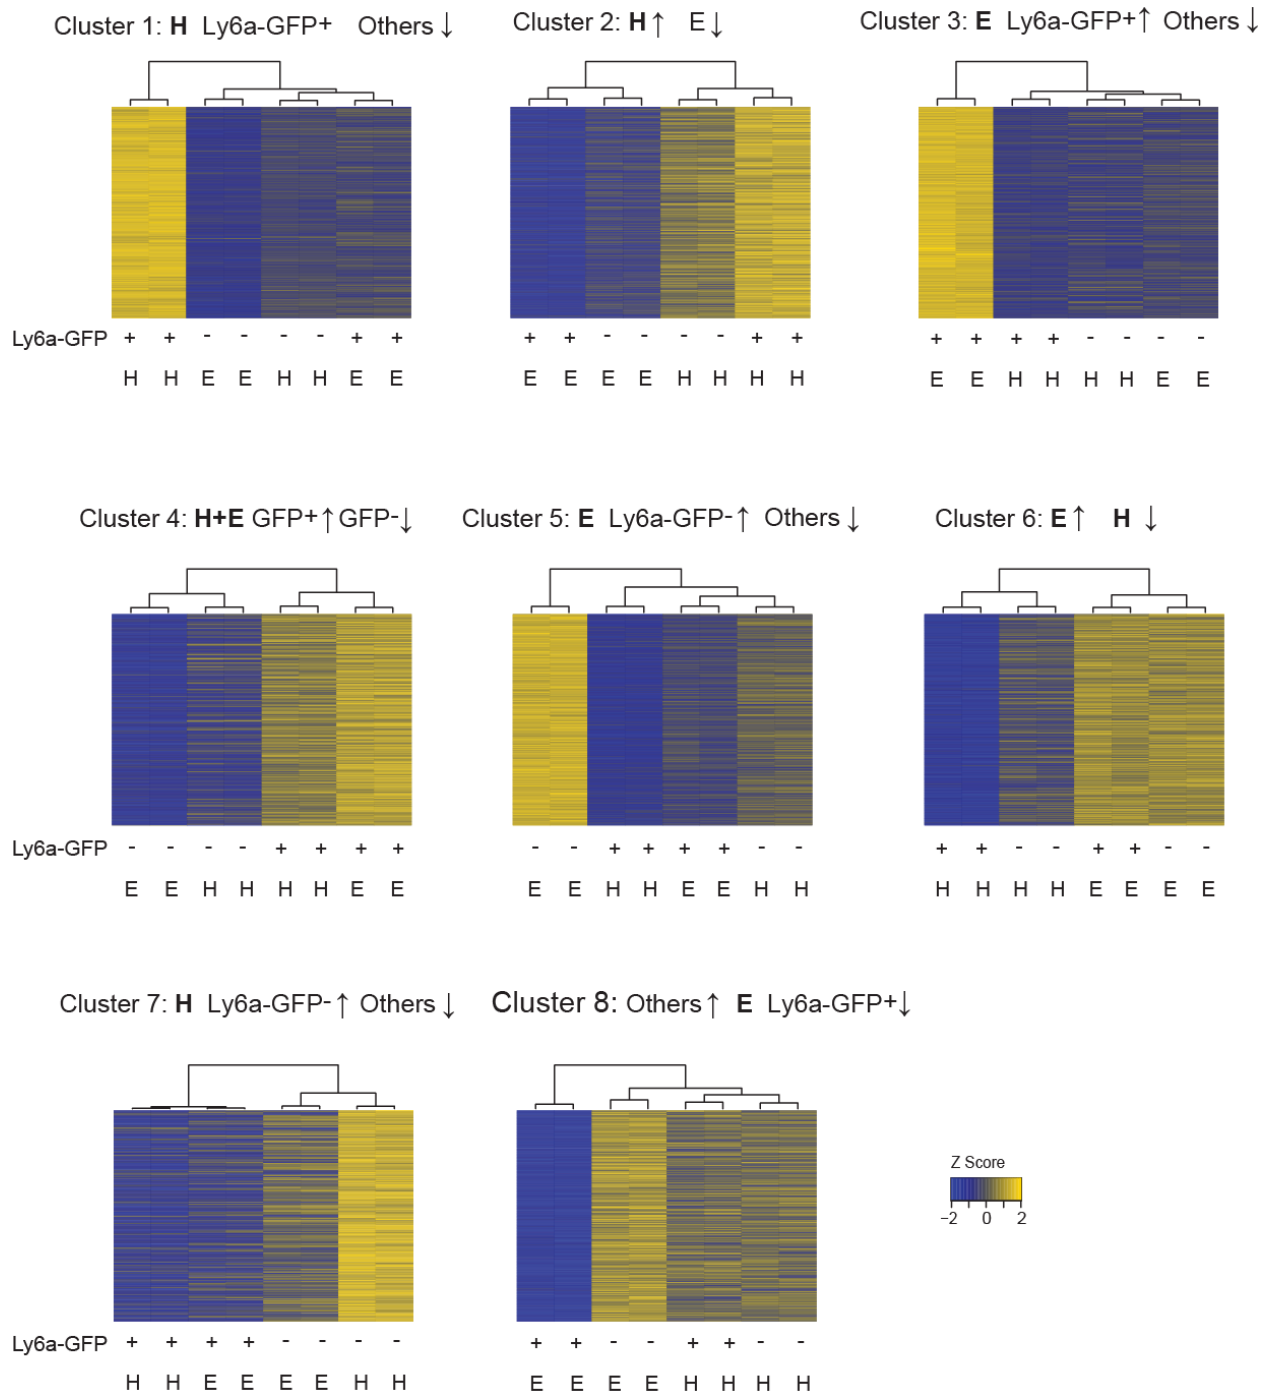

Figure S2. Heatmap of the eight gene clusters resulting from consensus clustering. Shown are Z-score normalized gene expression values. H, hematopoietic cluster; E, endothelium. Related to Figure 2.

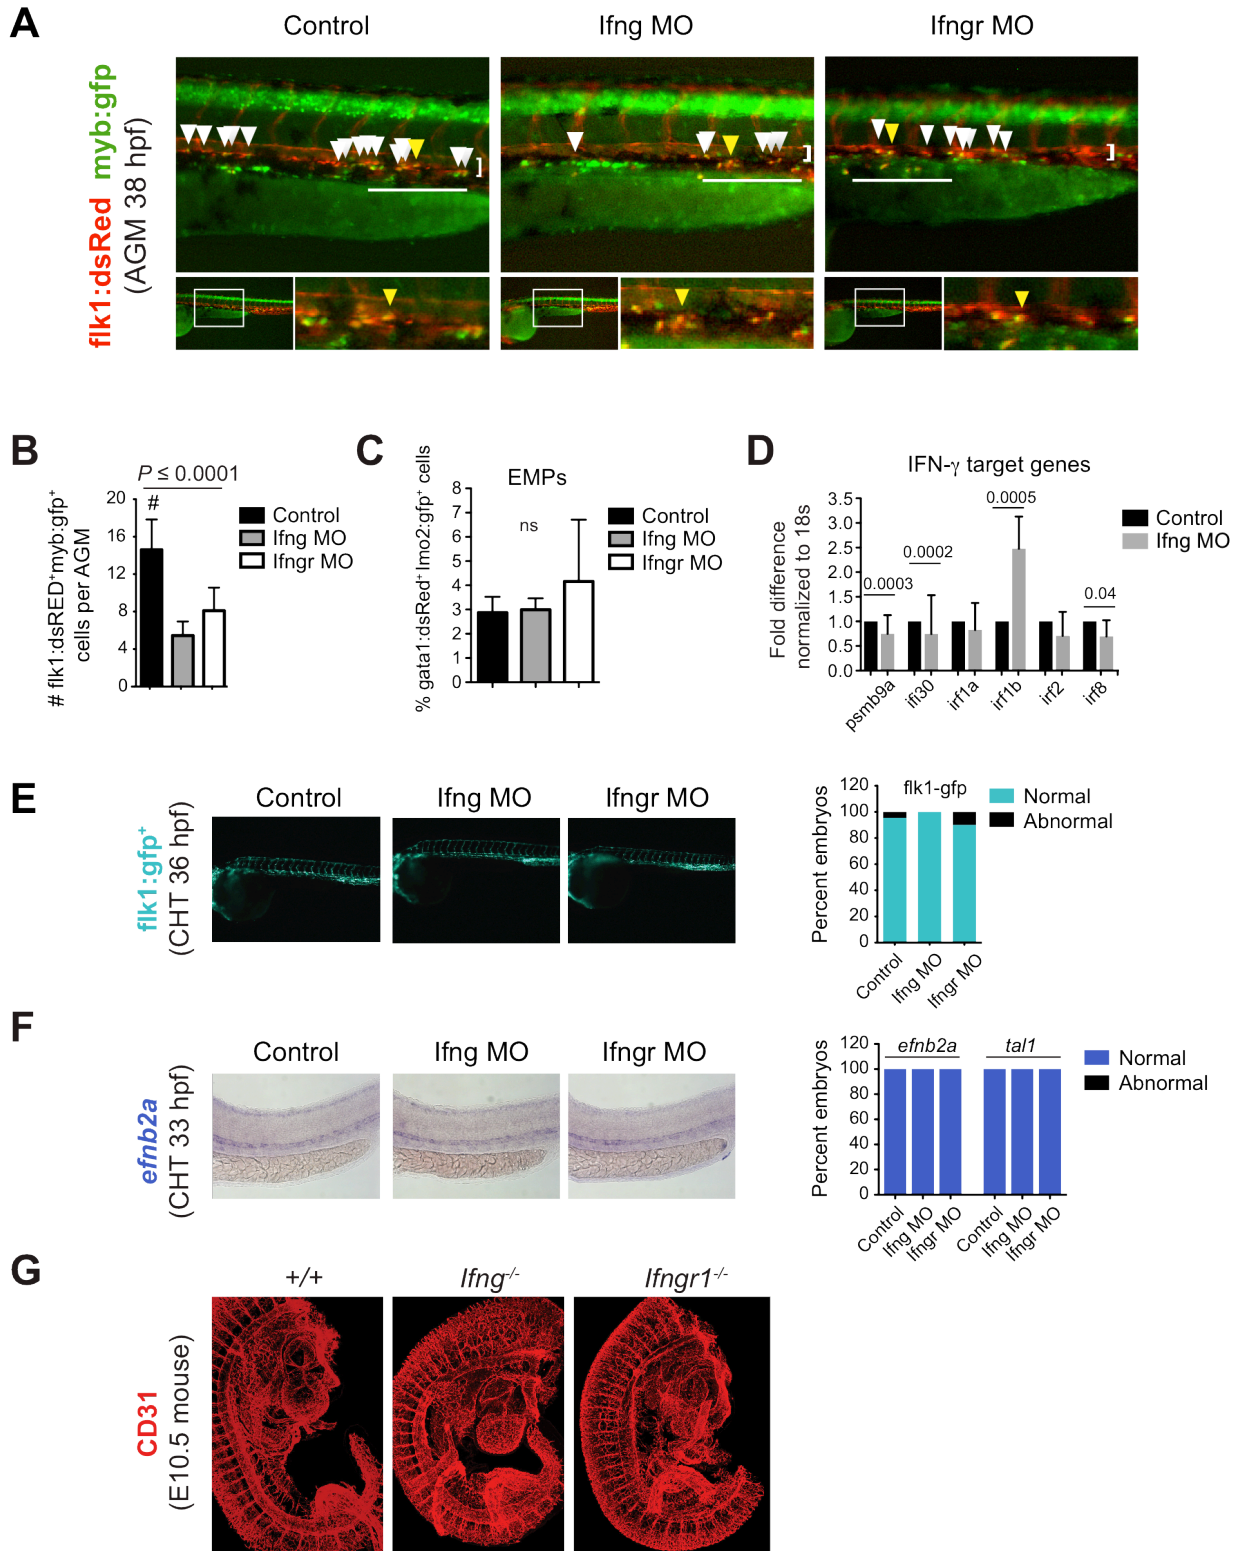

Figure S3. Controls for zebrafish IFN morphants and IFN deficient mouse embryos. Related to Figure 5.

- A. Representative images showing the effect of MOs targeting *lfng* and *lfngr* on numbers of *flk1:dsRed<sup>+</sup>myb:gfp<sup>+</sup>* cells (white arrowheads) in the AGM at 38 hpf ( $n \geq 9$ / condition). Picture on top is magnified from the boxed area in the in lower left picture. Area marked by the line in the top picture is amplified in the lower right picture. The yellow arrows point to the same cell in the upper and lower right panels. A bracket marks the aorta.
- B. Absolute counts of *flk1:dsRed<sup>+</sup>myb:gfp<sup>+</sup>* cells from embryos in panel A. *P* value determined by ANOVA and Dunnett's test as described in methods with Control as the comparator (Error bars = SD).
- C. Percentage of *gata1:dsRed<sup>+</sup>lmo2:gfp<sup>+</sup>* EMPs determined by FACS in 30hpf zebrafish embryos. Error bars represent mean  $\pm$  SD,  $n=5-8$  embryos/ condition, ns = not significant.
- D. qPCR for IFN target genes from *lfng* morphant zebrafish embryos versus controls normalized to *18s* rRNA ( $n=2$  replicates X 4 experiments, mean  $\pm$  SD).
- E. Representative effects of *lfng* and *lfngr* knockdown on *flk1:gfp<sup>+</sup>* cells at 36hpf (left) and phenotypic distribution of the effects in *flk1:gfp* morphant embryos (right) ( $n \geq 10$  embryos/ condition x 2 experiments).
- F. Representative effects of *lfng* and *lfngr* knockdown on *efnb2a* at 33hpf (left) and phenotypic distribution of the effects on *efnb2a* and *tal1* (representative data not shown) in morphant embryos (right).  $n \geq 10$  embryos/ condition x 2 experiments.
- G. Whole mount immunohistochemistry/confocal microscopy of E10.5 mouse embryos stained with an antibody to CD31 to examine the vasculature. The head and body walls are removed to facilitate imaging.

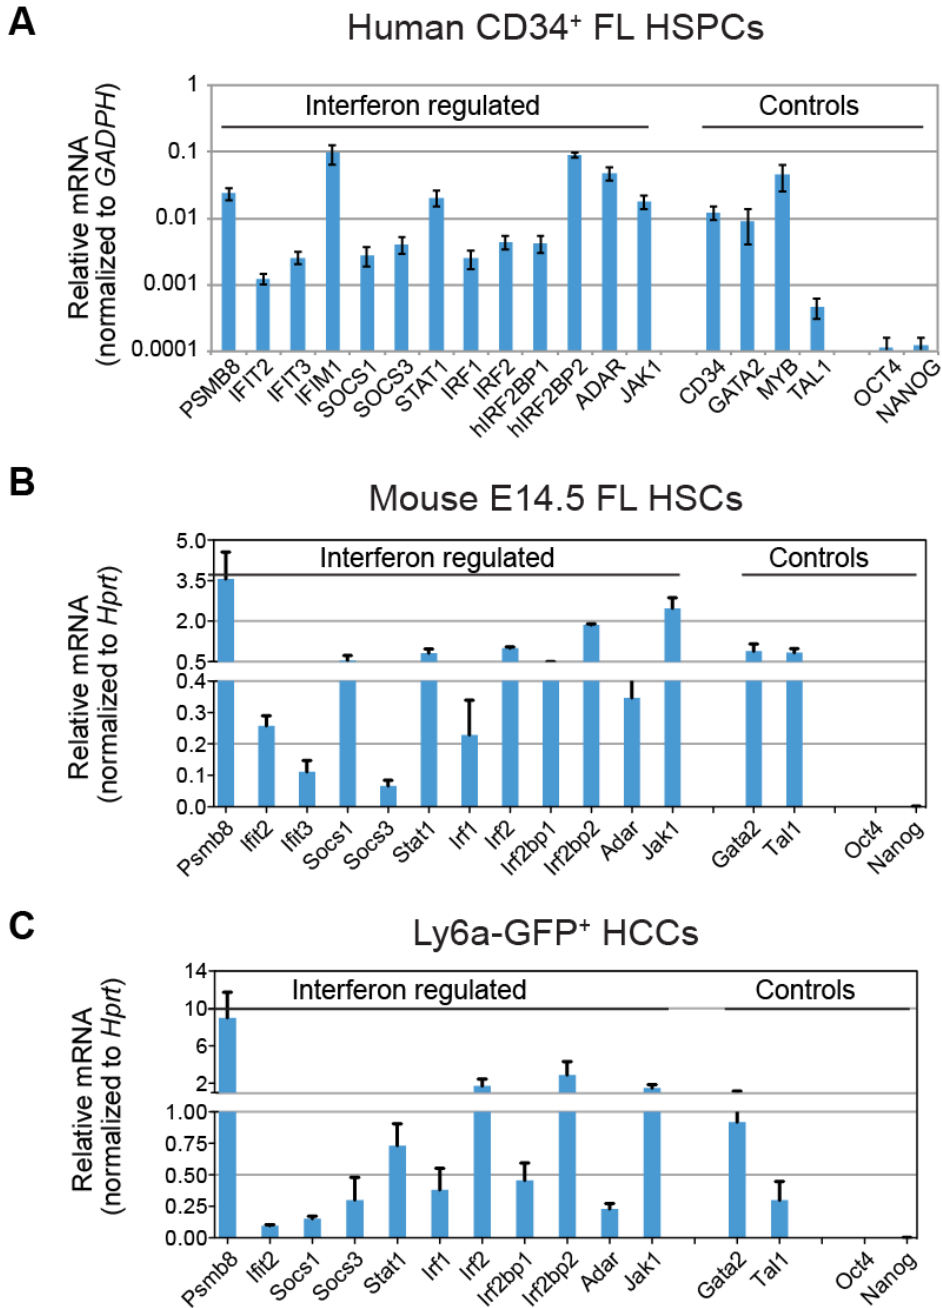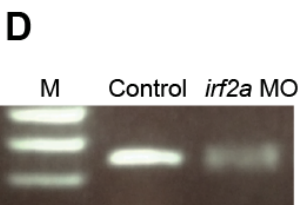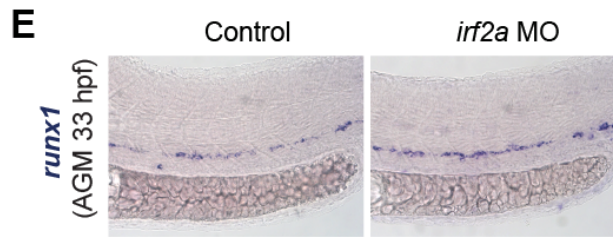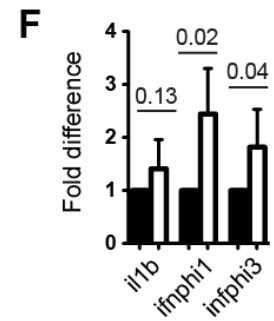

Figure S4. Expression of IRF2 target genes by qPCR. Related to Figure 6.

- A. Expression in hCD34<sup>+</sup> FL HSPCs, normalized to *GADPH*. Controls include genes expressed in HSPCs (*CD34*, *GATA2*, *MYB*, *TAL1*), as well as genes specifically expressed in embryonic stem cells (*OCT4*, *NANOG*) (mean  $\pm$  SD, n = 3).
- B. Expression of IRF2 target genes in phenotypic long term repopulating HSCs (LT-HSCs, CD150<sup>+</sup> CD48<sup>-</sup> LSK) from E14.5 mouse FL (mean  $\pm$  SD, n = 3).
- C. Expression of IRF2 target genes in Ly6a-GFP<sup>+</sup> hematopoietic cluster cells from the E10.5 mouse A+U+V (mean  $\pm$  SD, n = 3).
- D. Representative image of *irf2a* MO validation by RT-PCR indicates strong reduction in expression compared to sibling controls (20 pooled embryos/ condition).
- E. WISH for *runx1* in the AGM region of representative embryos injected with MO-1 targeting *irf2a*.
- F. qPCR for inflammatory cytokines in *irf2a* morphant embryos normalized to 18s (*italics*).

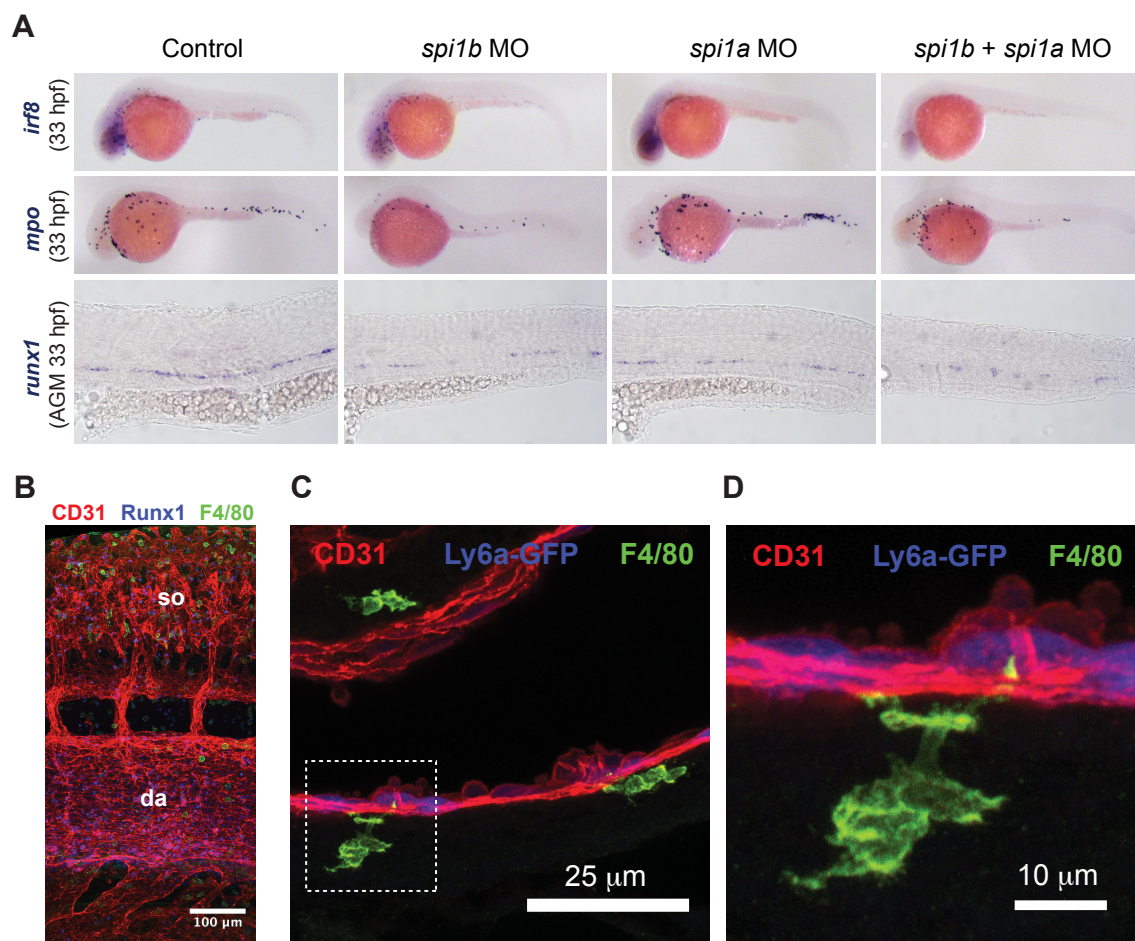

Figure S5. Primitive myeloid cells regulate HSPCs in the AGM region. Related to Figure 7.

A. Representative WISH for *irf8* (marks macrophages), *mpo* (marks granulocytes) in whole zebrafish embryos, and *runx1* in the AGM region following MO knockdown of *spi1a* and *spi1b* alone and in combination.

B. Whole mount immunohistochemistry/confocal microscopy of the mouse AGM region. da, dorsal aorta; so, somite. Image represents a 245  $\mu\text{m}$  section. CD31 labels endothelial and hematopoietic cells, Runx1 labels hematopoietic cells and hemogenic endothelium, F4/80 labels macrophages.



C. Umbilical artery with two F4/80<sup>+</sup> macrophages that have inserted processes between Ly6a-GFP<sup>+</sup> endothelial cells. Boxed area on left is magnified in panel D. Image is a Z-projection of 15 z-slices with a depth of 22.5  $\mu\text{m}$ .

D. High magnification view of macrophage boxed in panel C.

Table S1. Frequency of progenitors with lymphoid potential in sorted populations from the A+U+V. Related to Figure 1.

| Embryonic Age        | HCC Population <sup>1</sup> | No. cells/embryo <sup>2</sup> | Lymphoid progenitor frequency <sup>3</sup> |                  |
|----------------------|-----------------------------|-------------------------------|--------------------------------------------|------------------|
|                      |                             |                               | B cell                                     | T cell           |
| E10.5                | Ly6a-GFP <sup>+</sup>       | 184                           | 1 in 7                                     | 1 in 4           |
| E10.5                | Ly6a-GFP <sup>-</sup>       | 744                           | 1 in 42                                    | 1 in 40          |
| E10.5                | Ly6a-GFP <sup>+</sup>       | 269                           | 1 in 4                                     | 1 in 6           |
| E10.5                | Ly6a-GFP <sup>-</sup>       | 947                           | 1 in 63                                    | 1 in 48          |
| E10.5                | Ly6a-GFP <sup>+</sup>       | 177                           | 1 in 3                                     | 1 in 6           |
| E10.5                | Ly6a-GFP <sup>-</sup>       | 1096                          | 1 in 41                                    | 1 in 36          |
| <b>Average E10.5</b> | Ly6a-GFP <sup>+</sup>       | <b>210</b>                    | <b>1 in 4.6</b>                            | <b>1 in 5.3</b>  |
| <b>Average E10.5</b> | Ly6a-GFP <sup>-</sup>       | <b>929</b>                    | <b>1 in 48.7</b>                           | <b>1 in 41.3</b> |
| E11.5                | Ly6a-GFP <sup>+</sup>       | 340                           | 1 in 10                                    | 1 in 19          |
| E11.5                | Ly6a-GFP <sup>-</sup>       | 1060                          | 0                                          | 1 in 716         |
| E11.5                | Ly6a-GFP <sup>+</sup>       | 310                           | 1 in 13                                    | 1 in 16          |
| E11.5                | Ly6a-GFP <sup>-</sup>       | 1122                          | 0                                          | 0                |
| E11.5                | Ly6a-GFP <sup>+</sup>       | 450                           | 1 in 15                                    | 1 in 19          |
| E11.5                | Ly6a-GFP <sup>-</sup>       | 1354                          | 0                                          | 0                |
| E11.5                | Ly6a-GFP <sup>+</sup>       | 522                           | 1 in 7                                     | 1 in 30          |
| E11.5                | Ly6a-GFP <sup>-</sup>       | 1520                          | 1 in 2260                                  | 1 in 2260        |
| <b>Average E11.5</b> | Ly6a-GFP <sup>+</sup>       | <b>406</b>                    | <b>1 in 10.4</b>                           | <b>1 in 19.9</b> |
| <b>Average E11.5</b> | Ly6a-GFP <sup>-</sup>       | <b>1264</b>                   | <b>1 in 9040</b>                           | <b>1 in 2175</b> |

<sup>1</sup>Data are from three independent experiments for E10.5 embryos and 4 experiments for E11.5 embryos. HCC, hematopoietic cluster cell (CD31<sup>+</sup> VEC<sup>+</sup> ESAM<sup>+</sup> Kit<sup>+</sup>). No progenitors were found in the CD31<sup>+</sup> VEC<sup>+</sup> ESAM<sup>+</sup> Kit<sup>-</sup> endothelial populations (not shown).

<sup>2</sup> Total number of cells with the indicated markers per embryo determined by cell count from sorter.

<sup>3</sup> The frequency of progenitors within each of the sorted populations. B cells were scored as CD19<sup>+</sup> B220<sup>+</sup>, T cells as Th1.1<sup>+</sup> CD25<sup>+</sup>.

Table S2. Highly enriched Gene Ontology terms for each cluster. Related to Figure 2.

Table S3. The genes and their expression in each cluster after consensus clustering. Related to Figure 2.

Table S4. Gene Ontology terms for IRF2 bound genes determined by GREAT. Related to Figure 6.

## Supplemental material and methods

**Table S5-** Morpholino sequences

| Morpholino name                          | Sequence                  | Citation                  |
|------------------------------------------|---------------------------|---------------------------|
| IRF8-MO1                                 | AATGTTTCGCTTACTTTGAAAATGG | (Li et al. 2011))         |
| pu.1-MO1 (currently named <i>spi1b</i> ) | GATATACTGATACTCCATTGGTGGT | (Bukrinsky et al. 2009)   |
| spi1l (currently named <i>spi1a</i> )    | AGCGACTCACGCTGTGGAGGAACT  | (Bukrinsky et al. 2009)   |
| MO1-ifng1-1                              | TTTCTGTGCTGTGAACCAAGTGATG | (Sieger et al. 2009)      |
| MO1-ifng1-2                              | TGAAGGCGTTCGCTAAAGTTAGAGT | (Sieger et al. 2009)      |
| IRF2a_e1i1                               | GTACAGATCTCTCTCCTCACCTCAT |                           |
| IRF2a_ATG                                | CATTCGCATTCTGTCCACTGGCATC |                           |
| MO1-il1b                                 | CCCACAACTGCAAAATATCAGCTT  | (Lopez-Munoz et al. 2011) |
| MO3-tnfa                                 | GGCAGGATTTTCACCTTATGGAGCG | (Qi et al. 2010)          |
| crfb6_ATG                                | GTCATTTGACAAATATAAATCCAC  | (Aggad et al. 2010)       |
| crfb13_ATG                               | CAAACCAGGATCTCCAGACATTTTG | (Aggad et al. 2010)       |
| crfb17_ATG                               | GATGAGACAGATCAATATCCGCATT | (Aggad et al. 2010)       |
| crfb5_i1e2                               | GGATGCTGGAACACACACACACA   | (Levraud et al. 2007)     |

**Table S6** - Human qPCR primers

| Primer target | Primer Sequence          | Citation |
|---------------|--------------------------|----------|
| PSMB8-F       | GCAGGCTGTA CTATCTGCGAA   |          |
| PSMB8-R       | AGAGCCGAGTCCCATGTTTCAT   |          |
| IFIT2-F       | GACACGGTTAAAGTGTGGAGG    |          |
| IFIT2-R       | TCCAGACGGTAGCTTGCTATT    |          |
| IFIT3-F       | AGAAAAGGTGACCTAGACAAAGC  |          |
| IFIT3-R       | CCTTG TAGCAGCACCCAATCT   |          |
| SOCS1-F       | TTTTCGCCCTTAGCGTGAAGA    |          |
| SOCS1-R       | GAGGCAGTCGAAGCTCTCG      |          |
| SOCS3-F       | CCTGCGCCTCAAGACCTTC      |          |
| SOCS3-R       | GTCACTGCGCTCCAGTAGAA     |          |
| STAT1-F       | CGGCTGAATTTCCGGCACCT     |          |
| STAT1-R       | CAGTAACGATGAGAGGACCCT    |          |
| IRF1-F        | CTGTGCGAGTGTACCGGATG     |          |
| IRF1-R        | GGCTGGACTTCGACTTTCTTTC   |          |
| IRF2-F        | AAAACATGGAAGGCGAATTTTCAG |          |
| IRF2-R        | CCAGAGATGACTCAACTGGTTC   |          |
| IRF2BP1-F     | GCGGACTGTCTGGCAGAAC      |          |
| IRF2BP1-R     | GAAGCGCACATTGAACGGG      |          |
| IRF2BP2-F     | ACACCCATTTTGTGCAGTGC     |          |
| IRF2BP2-R     | ACTGGGACAATAGACCTCTCC    |          |
| ADAR-F        | ATCAGCGGGCTGTTAGAATATG   |          |
| ADAR-R        | AAACTCTCGGCCATTGATGAC    |          |

|         |                         |  |
|---------|-------------------------|--|
| JAK1-F  | CTTTGCCCTGTATGACGAGAAC  |  |
| JAK1-R  | ACCTCATCCGGTAGTGGAGC    |  |
| CD34-F  | CTACAACACCTAGTACCCTTGGA |  |
| CD34-R  | GGTGAACACTGTGCTGATTACA  |  |
| GATA2-F | GCAACCCCTACTATGCCAACC   |  |
| GATA2-R | CAGTGGCGTCTTGGAGAAG     |  |
| MYB-F   | AACCACACATGCAGCTACCC    |  |
| MYB-R   | GGTGTTCTCCCAAACAGGAA    |  |
| TAL1-F  | GTGCAGCTGAGTCCTCCCGC    |  |
| TAL1-R  | CCGGCTCCCCAAAGAACCCG    |  |
| OCT4-F  | CTTGAATCCCGAATGGAAAGGG  |  |
| OCT4-R  | GTGTATATCCCAGGGTGATCCTC |  |
| NANOG-F | TTTGTGGGCCTGAAGAAAAC    |  |
| NANOG-R | AGGGCTGTCCTGAATAAGCAG   |  |
| GAPDH-F | ACCCAGAAGACTGTGGATGG    |  |
| GAPDH-R | TTCAGCTCAGGGATGACCTT    |  |

**Table S7-** Mouse qPCR primers

| Primer target | Primer Sequence      | Citation               |
|---------------|----------------------|------------------------|
| Tlr2-F        | CATCACCGGTCAGAAAACAA |                        |
| Tlr2-R        | GCCACCAAGATCCAGAAGAG |                        |
| Psd4-F        | CTTGGCCTTAGGATCCACTG |                        |
| Psd4_R        | AAAGGGTGCTTTAGGTGAGC |                        |
| Fcrls-F       | GATGAGGATGCTGGAGCTGT |                        |
| Fcrls-R       | GAGGCCAGTGCAGAAAGTA  |                        |
| Tabpb-F       | CTCAAAGGAGAAGGCCACAG |                        |
| Tabpb-R       | ATGAGGGTGGCTTCCACA   |                        |
| Socs3-F       | TTTCGCTTCGGGACTAGC   |                        |
| Socs3-R       | GAGCCAGCGTGGATCTG    |                        |
| Isg20-F       | CCACGCCATTTGGTGAA    |                        |
| Isg20-R       | TCCTCCTCAGGGCATTG    |                        |
| Ifit2-F       | CTGCAGCCCTGCTTTGAG   |                        |
| Ifit2-R       | GCTGTGCGAGATTGCTCTC  |                        |
| Ifit3-F       | AGCCACACCCAGCTTTT    |                        |
| Ifit3-R       | TGGCACTTCAGCTGTGGA   |                        |
| Psm8-F        | TTGCTGCAATGCTGTCTACC |                        |
| Psm8-R        | CAGCTCCCTTTCTTCTTCA  |                        |
| Socs1-F       | GCCCCTCGAGTAGGATGG   |                        |
| Socs1-R       | ACGAGGAGGGCTCTGACC   |                        |
| Adar-F        | GGGAAGCCAAAGCCAAAG   |                        |
| Adar-R        | CCTGAGCCTCTGCTGGTT   |                        |
| Jak1-F        | GCCTGCCAGACTCCTGAC   |                        |
| Jak1-R        | CCTTCCAAAGCCATTCA    |                        |
| Stat1-F       | CACGCTGCCTATGATGTCTC | (Munakata et al. 2012) |
| Stat1-R       | ACGCTTGCTTTTCCGTATGT | (Munakata et al. 2012) |
| Gata2-F       | CCTCCAGCTTCACCCCTAA  |                        |
| Gata2-R       | CAGAGAGGGGTGGCTGTG   |                        |

|           |                         |                   |
|-----------|-------------------------|-------------------|
| Tal1-F    | AGCGGAGGAGTGGAGGTC      |                   |
| Tal1-R    | CCCTCTAGTTGCGGGTCA      |                   |
| Nanog-F   | ACCTCAGCCTCCAGCAGA      |                   |
| Nanog-R   | CCGCTTGCACTTCATCCT      |                   |
| Oct4-F    | GGAGGAAGCCGACAACAA      |                   |
| Oct4-R    | TCCACCTCACACGGTTCTC     |                   |
| Irf2bp1-F | ACCTCCAAGAGCCCCATC      |                   |
| Irf2bp1-R | CTGCTCCTCCGTGGTCAT      |                   |
| Irf2bp2-F | GCAGGTTGTTGGGTTTCG      |                   |
| Irf2bp2-R | CTTCCGGTTCTGGGGAAG      |                   |
| Il1b-F    | CGGACCCATATGAGCTGAA     |                   |
| Il1b-R    | TGTCGTTGCTTGGTTCTCC     |                   |
| Ifng-F    | CAGCAAGGCGAAAAAGGA      |                   |
| Ifng-R    | GGTGGACCACTCGGATGA      |                   |
| Tnf-F     | GCCACCACGCTCTTCTGT      |                   |
| Tnf-R     | TGAGGGTCTGGGCCATAG      |                   |
| Ifna-F    | CCTGCTGGCTGTGAGGA       |                   |
| Ifna-R    | GGAAGACAGGGCTCTCCAG     |                   |
| Ifnar1-F  | CACGGTCGCTGTAGAAGTAAAG  |                   |
| Ifnar1-R  | TCTCCTCCTCTTCGTTGGAATA  |                   |
| Irf1-F    | CCAAATCCCAGGGCTGAT      |                   |
| Irf1-R    | CGGAACAGACAGGCATCC      |                   |
| Irf2-F    | CTCCGCTCTTCAGAAACTGG    |                   |
| Irf2-R    | GGCACATCGAAAATTTGCTT    |                   |
| Hprt-F    | CTCCTCAGACCGCTTTTTGC    | (Cai et al. 2011) |
| Hprt-R    | TAACTGGTTCATCATCGCTAATC | (Cai et al. 2011) |

**Table S8-** Zebrafish qPCR primers

| Primer target | Primer sequence         | Citation             |
|---------------|-------------------------|----------------------|
| cd44a-F       | TGAAGAGAATGAAGAGATGGTGG |                      |
| cd44a-R       | GCACTCTTACTCGGTCCGTAC   |                      |
| cd44b-F       | AGCGCATCAGGACACCAC      |                      |
| cd44b-R       | TGATCCGTTCTCTGCTGCTG    |                      |
| crfb1-F       | GGGAATATGAAGGCAGTGCCT   |                      |
| crfb1-R       | GGCTGGTTCCTTTGTGTAGC    |                      |
| crfb13-F      | GTCCACGTGAACCAGTCTGT    |                      |
| crfb13-R      | ACCACAGAACGACGAAAACA    |                      |
| crfb17-F      | TGTGACGCTGCTGGTCATTA    |                      |
| crfb17-R      | GTTTGGGGTCAGCTGGTTCT    |                      |
| crfb2-F       | TGTGCACTCCGAGACTTGTT    |                      |
| crfb2-R       | AGTTCCTCCTCTGCCTCTCC    |                      |
| crfb5-F       | CTGTACTTCCTGTTGGCGCT    |                      |
| crfb5-R       | TCCATATGCTCGCACACACA    |                      |
| crfb6-F       | TGCTGCTTAAATCCGCCTCA    |                      |
| crfb6-R       | TTTCCCTTCTCTGCACGGAC    |                      |
| ifi30-F       | GTTGTGCTCGTCGCCGTGTT    | (Sieger et al. 2009) |

|            |                                |                           |
|------------|--------------------------------|---------------------------|
| ifi30-R    | GGCGGATTCAGTGCATCGGT           | (Sieger et al. 2009)      |
| ifit2-F    | TGGACGCTGGTGAAGTTCAA           |                           |
| ifit2-R    | CTGCTGCCGTTTTTCACCTTC          |                           |
| ifn-phi1-F | GTGGCAAGATACGCAAAGCC           |                           |
| ifn-phi1-R | ATTGACCCTTGCGTTGCTTG           |                           |
| ifn-phi2-F | GACAGCTCTACAAAATGG<br>AATTTTGG | (Aggad et al. 2010)       |
| ifn-phi2-R | CTGCTTTTGGCTACACCGGTT          | (Aggad et al. 2010)       |
| ifn-phi3-F | GATTCCGTATAGGCATCTGTCA         | (Aggad et al. 2010)       |
| ifn-phi3-R | GCGTCAATGTTCTGGAGTGT           | (Aggad et al. 2010)       |
| ifn-phi4-F | GTCAAACACAGACTTCAGCATCA        |                           |
| ifn-phi4-R | CGAACTGGATCTGCTTCTCA           |                           |
| ifng1.1-F  | GCGCATAACAGATTTTCGACGG         | (Sieger et al. 2009)      |
| ifng1.1-R  | TTTTTCTGTGGAGGCCCGAT           | (Sieger et al. 2009)      |
| ifng1.2-F  | TACAAAGGAGAGGCTGGCAC           |                           |
| ifng1.2-R  | TGCCGTCTCTTGCGTTCTTT           |                           |
| il1b-F     | CCGCTCCACATCTCGTACTC           | (Sieger et al. 2009)      |
| il1b-R     | CCATCTCCACCATCTGCGAA           | (Sieger et al. 2009)      |
| irf1a-F    | TCCTAAAACGTGGAAGGCGA           |                           |
| irf1a-R    | TGTTTGTGCTGCAGGTGAAG           |                           |
| irf1b-F    | ACACCATCGACAGCACTCAG           | (Lopez-Munoz et al. 2011) |
| irf1b-R    | CTAAGATGGCTTCGCTGTCC           | (Lopez-Munoz et al. 2011) |
| irf2-F     | CTGAGAGCGAAACGGACAGC           |                           |
| irf2-R     | GAAGAGGCTCCAGGATGTCC           |                           |
| irf2a-F    | GCCCAGGTATCGACAAACCA           |                           |
| irf2a-R    | CTGCTCCGGGTCCATCTTTT           |                           |
| irf3-F     | AGCCAAACACCCAGAGAACT           |                           |
| irf3-R     | AGCCAAACACCCAGAGAACT           |                           |
| irf7-F     | TCCCCTCTCAGCTCAGATGG           |                           |
| irf7-R     | TCCCCTCTCAGCTCAGATGG           |                           |
| irf8-F     | GAGCCCACTGTCACACTCTG           |                           |
| irf8-R     | ACAAGCCATCTGATCACTGACT         |                           |
| irf9-F     | CGCCAACCCAGCTGTTTAAC           |                           |
| irf9-R     | TGACCTCTTCTATCTGCGCC           |                           |
| isg15-F    | CGGTGATGCTACCGTTGGAA           |                           |
| isg15-R    | TGGCCCTTCTCGTTCTTGAC           |                           |
| isg20-f    | CTCTCTGAAGAAGCTGGCACA          |                           |
| isg20-R    | TTACAGGCTGCAGTCCATCA           |                           |
| psmb9a-F   | GACTCAGAGCAGGCAGGTTT           |                           |
| psmb9a-R   | ACACGATTCACCACTGACTCC          |                           |
| socs3a-F   | CCCCAGCAGCTCAAAGACTT           |                           |
| socs3a-R   | GCAAGAATGGCGCTTCAACA           |                           |
| socs3b-F   | TAGACGTGTCCACCAACGG            |                           |
| socs3b-R   | TTGAGTGGGAGAACGCTGTC           |                           |
| stat1a-F   | AGAAGGCAGACGAGGGATAC           |                           |
| stat1a-R   | AAAACCCGTTTCGAGTCACTC          |                           |
| stat1b-F   | GCTGCTCCAATGAAGGTTCC           |                           |

---

|          |                       |                      |
|----------|-----------------------|----------------------|
| stat1b-R | GCAACGGGTCTTGCAACAG   |                      |
| stat2-F  | ATGTCAAAGAGGGGCCAGTG  |                      |
| stat2-R  | GCTTTCTGGTGGTGGTGAGA  |                      |
| tnfa-F   | AAGGAGAGTTGCCTTTACCGC | (Sieger et al. 2009) |
| tnfa-R   | CGTGCAGATTGAGCGGATTG  | (Sieger et al. 2009) |



### Supplemental References

- Aggad D, Stein C, Sieger D, Mazel M, Boudinot P, Herbomel P, Levraud JP, Lutfalla G, Leptin M. 2010. In vivo analysis of Ifn-gamma1 and Ifn-gamma2 signaling in zebrafish. *J Immunol* **185**: 6774-6782.
- Bukrinsky A, Griffin KJ, Zhao Y, Lin S, Banerjee U. 2009. Essential role of spi-1-like (spi-1l) in zebrafish myeloid cell differentiation. *Blood* **113**: 2038-2046.
- Cai X, Gaudet JJ, Mangan JK, Chen MJ, De Obaldia ME, Oo Z, Ernst P, Speck NA. 2011. Runx1 loss minimally impacts long-term hematopoietic stem cells. *PLoS One* **in press**.
- Levraud JP, Boudinot P, Colin I, Benmansour A, Peyrieras N, Herbomel P, Lutfalla G. 2007. Identification of the zebrafish IFN receptor: implications for the origin of the vertebrate IFN system. *J Immunol* **178**: 4385-4394.
- Li L, Jin H, Xu J, Shi Y, Wen Z. 2011. Irf8 regulates macrophage versus neutrophil fate during zebrafish primitive myelopoiesis. *Blood* **117**: 1359-1369.
- Lopez-Munoz A, Sepulcre MP, Roca FJ, Figueras A, Meseguer J, Mulero V. 2011. Evolutionary conserved pro-inflammatory and antigen presentation functions of zebrafish IFNgamma revealed by transcriptomic and functional analysis. *Molecular immunology* **48**: 1073-1083.
- Munakata K, Takashima K, Nishiyama M, Asano N, Mase A, Hioki K, Ohnishi Y, Yamamoto M, Watanabe K. 2012. Microarray analysis on germfree mice elucidates the primary target of a traditional Japanese medicine jumentaihoto: acceleration of IFN-alpha response via affecting the ISGF3-IRF7 signaling cascade. *BMC genomics* **13**: 30.
- Qi F, Song J, Yang H, Gao W, Liu NA, Zhang B, Lin S. 2010. Mmp23b promotes liver development and hepatocyte proliferation through the tumor necrosis factor pathway in zebrafish. *Hepatology* **52**: 2158-2166.
- Sieger D, Stein C, Neifer D, van der Sar AM, Leptin M. 2009. The role of gamma interferon in innate immunity in the zebrafish embryo. *Dis Model Mech* **2**: 571-581.
